# Supplementary material
Source: PubMed Central journal article supplement (PMC4524042)
Supplement: JB.00339-15_zjb999093718so1.pdf [file JB.00339-15_zjb999093718so1.pdf]

**Table S1. Bacterial strains used in this study.**

| species               | strain     | relevant genotype                                                                                            | source     |
|-----------------------|------------|--------------------------------------------------------------------------------------------------------------|------------|
| <i>S. Typhimurium</i> | 14028s     | Wild-type                                                                                                    | ATCC       |
| <i>S. Typhimurium</i> | KAM31      | $\Delta gfrR::kan$                                                                                           | (27)       |
| <i>S. Typhimurium</i> | KAM67      | $\Delta gfrR$                                                                                                | (27)       |
| <i>S. Typhimurium</i> | KAM32      | $\Delta gfrAB::kan$                                                                                          | (27)       |
| <i>S. Typhimurium</i> | KAM42      | $\Delta gfrAB$                                                                                               | (27)       |
| <i>S. Typhimurium</i> | GLS01      | $\Delta gfrE::kan$                                                                                           | this study |
| <i>S. Typhimurium</i> | GLS03      | $\Delta gfrE$                                                                                                | this study |
| <i>S. Typhimurium</i> | GLS02      | $\Delta gfrF::kan$                                                                                           | this study |
| <i>S. Typhimurium</i> | GLS04      | $\Delta gfrF$                                                                                                | this study |
| <i>S. Typhimurium</i> | KAM91      | $\Delta ptsH::kan$                                                                                           | (27)       |
| <i>S. Typhimurium</i> | KAM95      | $\Delta ptsH$                                                                                                | (27)       |
| <i>S. Typhimurium</i> | GLS05      | $\Delta ldcC::kan$                                                                                           | this study |
| <i>S. Typhimurium</i> | KAM129     | $\Delta ldcC$                                                                                                | this study |
| <i>S. Typhimurium</i> | DM2591     | $\Delta cadA::mudJ$                                                                                          | D. Downs   |
| <i>S. Typhimurium</i> | KAM136     | $\Delta cadA::mudJ \Delta ldcC$                                                                              | this study |
| <i>S. Typhimurium</i> | GLS06      | $\Delta patA::kan$                                                                                           | this study |
| <i>S. Typhimurium</i> | KAM130     | $\Delta patA$                                                                                                | this study |
| <i>S. Typhimurium</i> | GLS07      | $\Delta patD::kan$                                                                                           | this study |
| <i>S. Typhimurium</i> | KAM131     | $\Delta patD$                                                                                                | this study |
| <i>S. Typhimurium</i> | GLS08      | $\Delta gabT::kan$                                                                                           | this study |
| <i>S. Typhimurium</i> | KAM133     | $\Delta gabT$                                                                                                | this study |
| <i>S. Typhimurium</i> | PBK01      | $\Delta hisC::kan$                                                                                           | this study |
| <i>S. Typhimurium</i> | PBK02      | $\Delta hisC$                                                                                                | this study |
| <i>S. Typhimurium</i> | ACB01      | $\Delta rpoN$                                                                                                | A. Bono    |
| <i>E. coli</i>        | BL21 (DE3) | F <sup>-</sup> <i>ompT gal dcm lon hsdSB(rB-mB-) λ</i> (DE3 [ <i>lacI lacUV5-T7 gene 1 ind1 sam7 nin5</i> ]) | (18)       |
| <i>E. coli</i>        | KAM216     | BL21/DE3 $\lambda$ /pACYC184+ <i>plyE</i> /pET21a+ <i>gfrE</i>                                               | this study |
| <i>E. coli</i>        | KAM217     | BL21/DE3 $\lambda$ /pACYC184+ <i>plyE</i> /pET21a+ <i>gfrF</i>                                               | this study |

**Table S2. Plasmids used in this study.**

| <b>Plasmid</b>      | <b>Relevant characteristics</b>                                                                                                                              | <b>Ref.</b> |
|---------------------|--------------------------------------------------------------------------------------------------------------------------------------------------------------|-------------|
| pKD46               | expresses $\lambda$ phage recombinase genes $\gamma$ , $\beta$ and <i>exo</i> from arabinose-inducible <i>ParaB</i> promoter; temperature-sensitive replicon | (21)        |
| pKD4                | template plasmid used to generate amplicons for inactivation of target genes in the $\lambda$ Red system                                                     | (21)        |
| pCP20               | expresses FLP enzyme for removal of kan gene flanked by FRT sites; temperature-sensitive replicon                                                            | (35)        |
| pET21a              | vectors carries an N-terminal T7 Tag sequence and T7 promoter                                                                                                | Novagen     |
| pET21a+ <i>gfrE</i> | carries <i>S. Typhimurium gfrE</i> under control of T7 promoter in pET21a                                                                                    | this study  |
| pET21a+ <i>gfrF</i> | carries <i>S. Typhimurium gfrF</i> under control of T7 promoter in pET21a                                                                                    | this study  |

**Table S3. Primers used in this study.**

| <b>Sequence</b>                                                    | <b>Experiment</b>              |
|--------------------------------------------------------------------|--------------------------------|
| 5'-<br>ATTTTCGGTTCCTGGATAGGGTTATTTTATGTGTAGGCTGGAGCTG<br>CTTC-3'   | <i>gfrE</i> knock out<br>λ red |
| 5'-<br>CAGGTACTCGTCCTGATTA AAAACCCAACATCATATGAATATCCTCC<br>TTA-3'  | <i>gfrE</i> knock out<br>λ red |
| 5'-<br>TAAAAGAGAATGTCATATATGCCGGGTCATATGAATATCCTCCTT<br>A-3'       | <i>gfrF</i> knock out<br>λ red |
| 5'-<br>CGATTTTCGATCGCGTTTTAAAAAGTAAAATTGTGTAGGCTGGAGCT<br>GCTTC-3' | <i>gfrF</i> knock out<br>λ red |
| 5'-<br>GCCTGGGCCGATGCATGGAAGGCATTGTAATGTGTAGGCTGGAGC<br>TGCTTC-3'  | <i>ldcC</i> knock out<br>λ red |
| 5'-<br>GATGTGATGAACCTGTTTTAATCCCAGCATCATATGAATATCCTCC<br>TTA-3     | <i>ldcC</i> knock out<br>λ red |
| 5'-GCCTGCCTACTATGAGCC-3'                                           | <i>ldcC</i> flanking           |
| 5'-GATGTGATGAACCTGTTTTAATC-3'                                      | <i>ldcC</i> flanking           |
| 5'-TTTCGGTTCCTGGATAGG-3'                                           | <i>gfrEF</i> flanking          |
| 5'-TGGAGATCAAAGTGGTGAATG-3'                                        | <i>gfrEF</i> flanking          |
| 5'-<br>TGAAAACTACGCGCAATATGCTGGCGTAAATGTGTAGGCTGGAGC<br>TGCTTC-3'  | <i>hisC</i> knock out<br>λ red |
| 5'-<br>GTTCTACGCAGGCGGTCTGTTGCAGGGCATCATATGAATATCCTCC<br>TTA-3'    | <i>hisC</i> knock out<br>λ red |
| 5'-CGCGTAAACGCCCTCAAG-3'                                           | <i>hisC</i> flanking           |
| 5'-CCGGTCGATGAAAAGATACTTC-3'                                       | <i>hisC</i> flanking           |
| 5'-<br>ATCGAGAAGCGAACGCTAAACCATGAGGAATGTGTAGGCTGGAGC<br>TGCTTC-3'  | <i>patA</i> knock out<br>λ red |
| 5'-<br>GGATAAGCACAGCGCCATCCGGCATCGTTTCATATGAATATCCTCC<br>TTA-3'    | <i>patA</i> knock out<br>λ red |
| 5'-ACGCACTGAATCTCATCG-3'                                           | <i>patA</i> flanking           |
| 5'-TGGTGATTGTGATGGGATTC-3'                                         | <i>patA</i> flanking           |
| 5'-<br>AGCGGCGGCCCGTTCGCCGAAATCGATTATGTGTAGGCTGGAGC<br>TGCTTC-3'   | <i>patD</i> knock out<br>λ red |

|                                                                   |                                |
|-------------------------------------------------------------------|--------------------------------|
| 5'-<br>GGATCATTTACTGTTTCAGAAAAATCGTGAACATATGAATATCCTCC<br>TTA-3'  | <i>patD</i> knock out<br>λ red |
| 5'-GTCAGCTCACAACCTGAC-3'                                          | <i>patD</i> flanking           |
| 5'-CGCAGCAAGTACTCAAAGG-3'                                         | <i>patD</i> flanking           |
| 5'-<br>GAAATCAAATATATGTGCATCGGCCTTTAATGTGTAGGCTGGAGCT<br>GCTTC-3' | <i>gabT</i> knock out<br>λ red |
| 5'-<br>ACGTCGCCACCCGACGCTGCTTATTGGACACATATGAATATCCTCC<br>TTA-3'   | <i>gabT</i> knock out<br>λ red |
| 5'-GTTCAAATACGGCATCGAAG-3'                                        | <i>gabT</i> flanking           |
| 5'-CCGATAAGACAGTTACGTCG-3'                                        | <i>gabT</i> flanking           |
| 5'-CATATGATGTCACCAACCATGCTG-3'                                    | GfrE<br>purification           |
| 5'-AAGCTTGATTTTACTTTTTTAAAACGCGATCG-3'                            | GfrE<br>purification           |
| 5'-CATATGATGTTGGGTTTTAATCAGGACG-3'                                | GfrF<br>purification           |
| 5'-AAGCTTATAATCGAACTGACGGTAGTAACG-3'                              | GfrF<br>purification           |

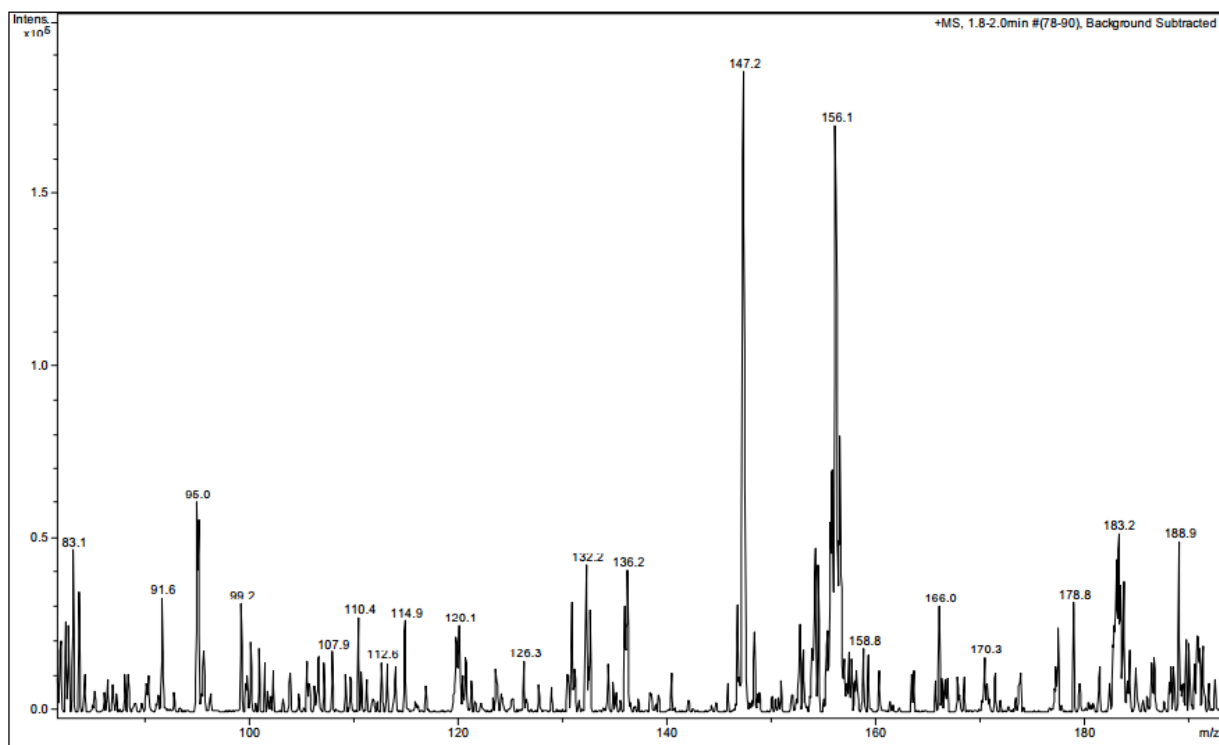

**Figure S1. Mass spectrum of combined extracellular and intracellular fractions of *S. Typhimurium* cells grown in minimal medium containing fructoselysine as the sole carbon and nitrogen source.** The mass spectrum revealed prominent peaks with the mass expected for lysine ( $m/z$  147.2,  $(M+1)^+$ ) and histidine ( $m/z$  156.1,  $(M+1)^+$ ). Both of these peaks were absent in the mass spectrum of extracts prepared from cells grown with arabinose and ammonium.

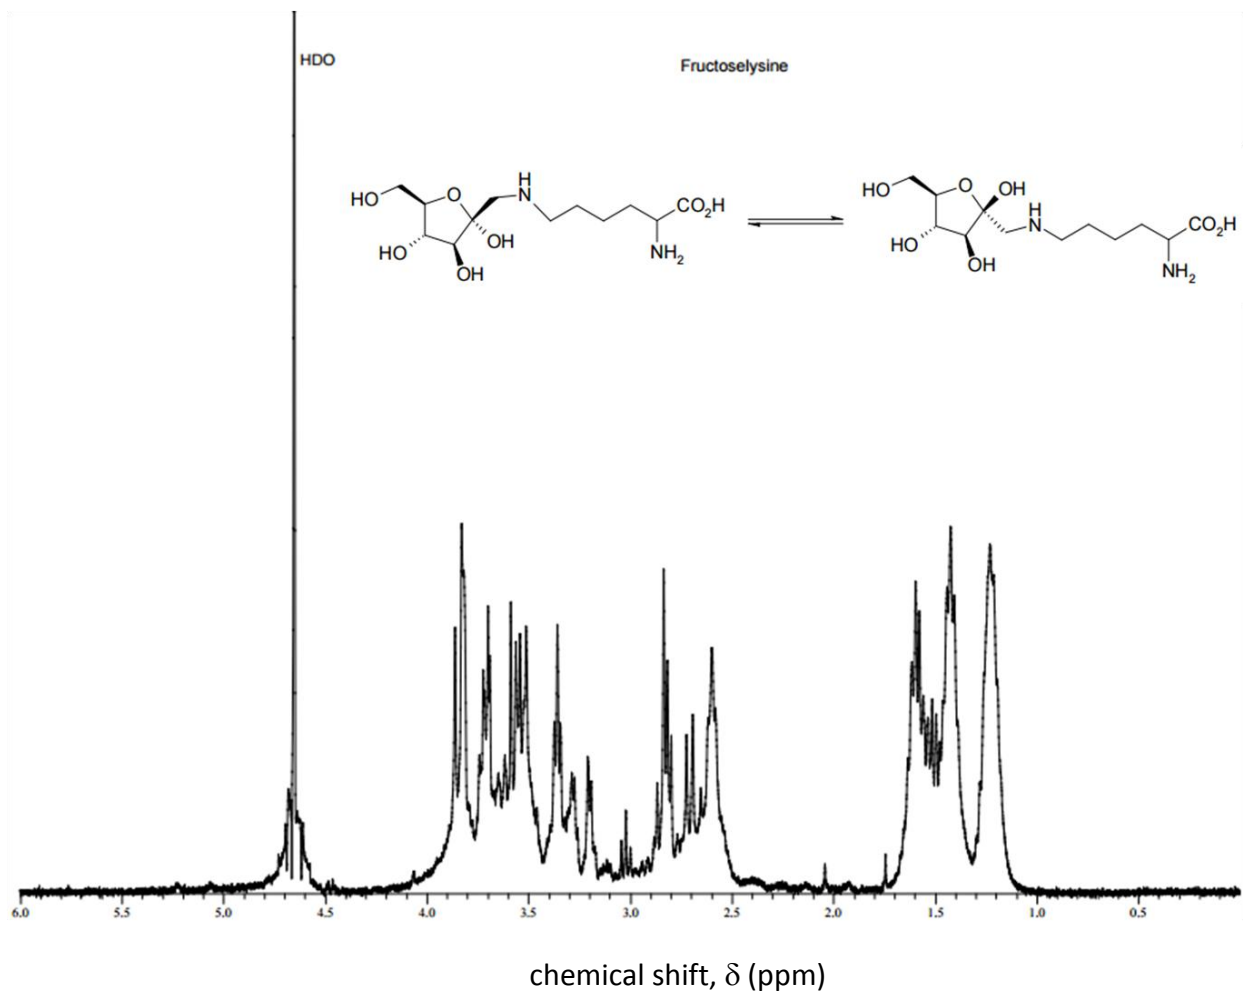

**Figure S2.  $^1\text{H-NMR}$  of fructoselysine.** The  $^1\text{H-NMR}$  spectrum was similar to that reported by Wiame *et al.* (8). The structures of fructoselysine with the sugar in the alpha (right) and beta (left) forms are shown.

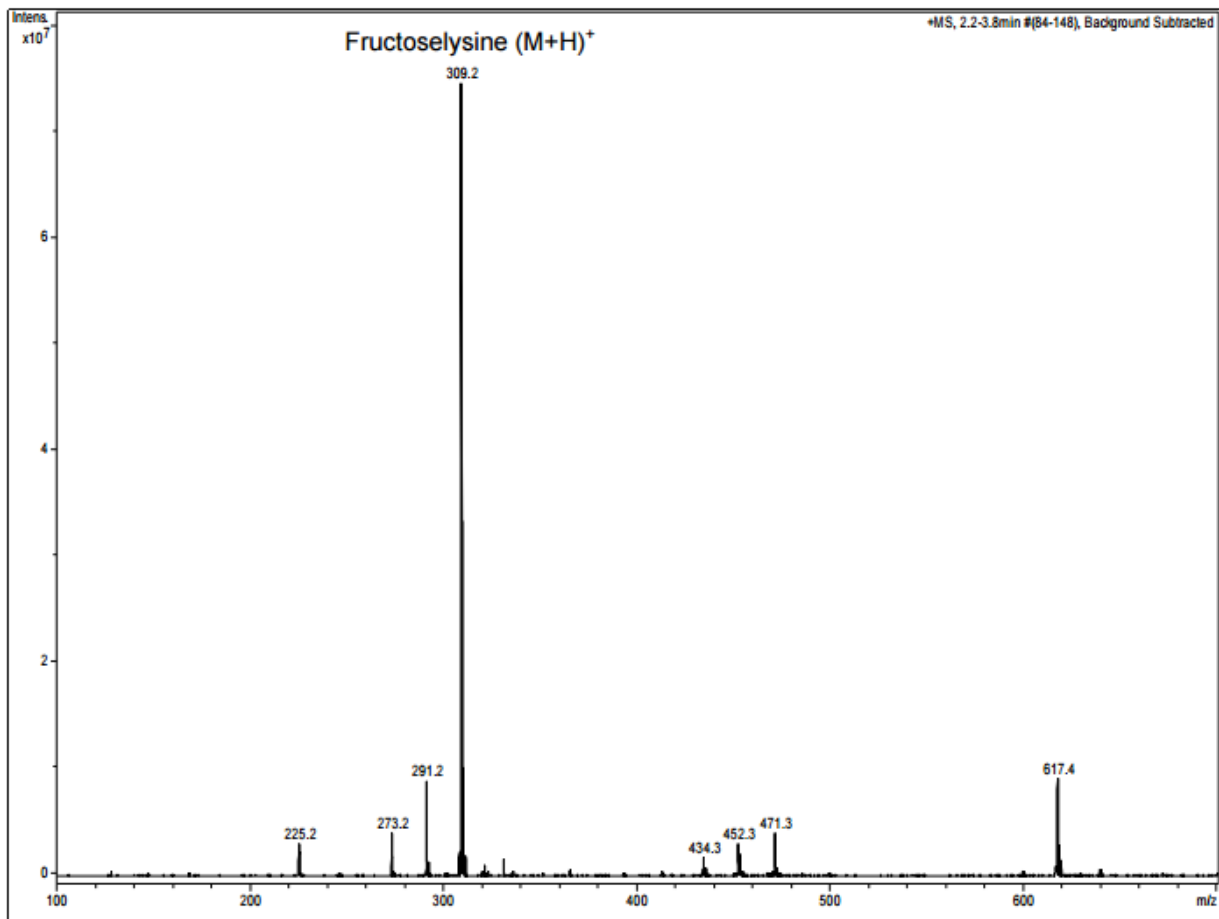

**Figure S3. Mass spectrum of fructoselysine.** A prominent peak with the expected mass for fructoselysine ( $m/z$  309,  $(M+1)^+$ ) was observed in the mass spectrum of a sample of the final product from the fructoselysine synthesis. Note that there are not significant amounts of the reacting materials in the preparation: Boc-lysine ( $m/z$  247.3,  $(M+1)^+$ ); glucose ( $m/z$  181.2,  $(M+1)^+$ ); lysine ( $m/z$  147.2,  $(M+1)^+$ ).

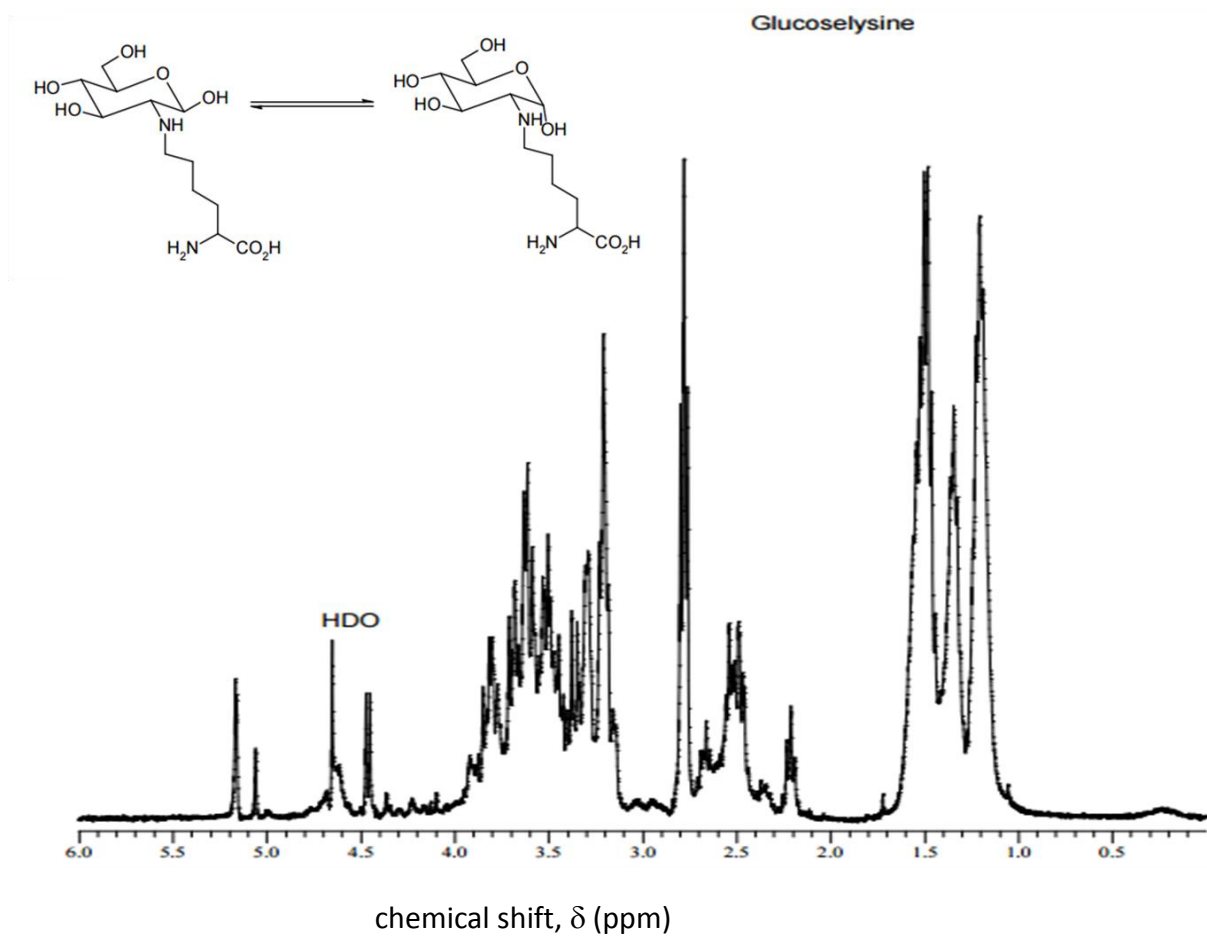

**Figure S4.  $H^1$ -NMR of glucoselysine.** The  $H^1$ -NMR spectrum was as expected and included the two signals corresponding to the anomeric proton of glucose ( $\delta = 5.2$  and  $5.1$ ). The structures of glucoselysine with the sugar in the alpha (right) and beta (left) forms are shown.



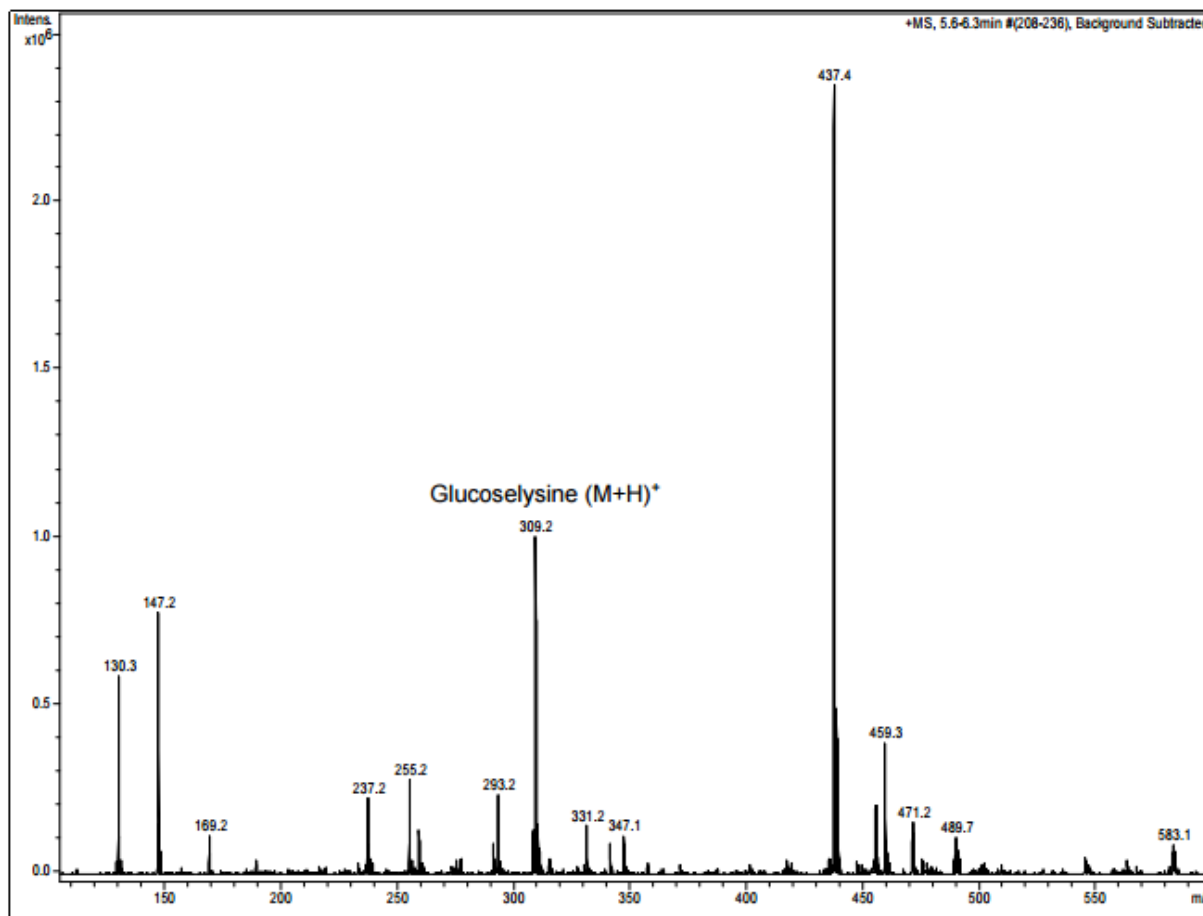

**Figure S5. Mass spectrum of glucoselysine.** A peak with the expected mass for glucoselysine ( $m/z$  309,  $(M+1)^+$ ) was observed in a sample of the final product from the glucoselysine synthesis. Although there are not significant amounts of the reacting materials: Boc-lysine ( $m/z$  247.3,  $(M+1)^+$ ) or fructose ( $m/z$  181.2,  $(M+1)^+$ ), there does appear to be some lysine ( $m/z$  147.2,  $(M+1)^+$ ) in the final product.

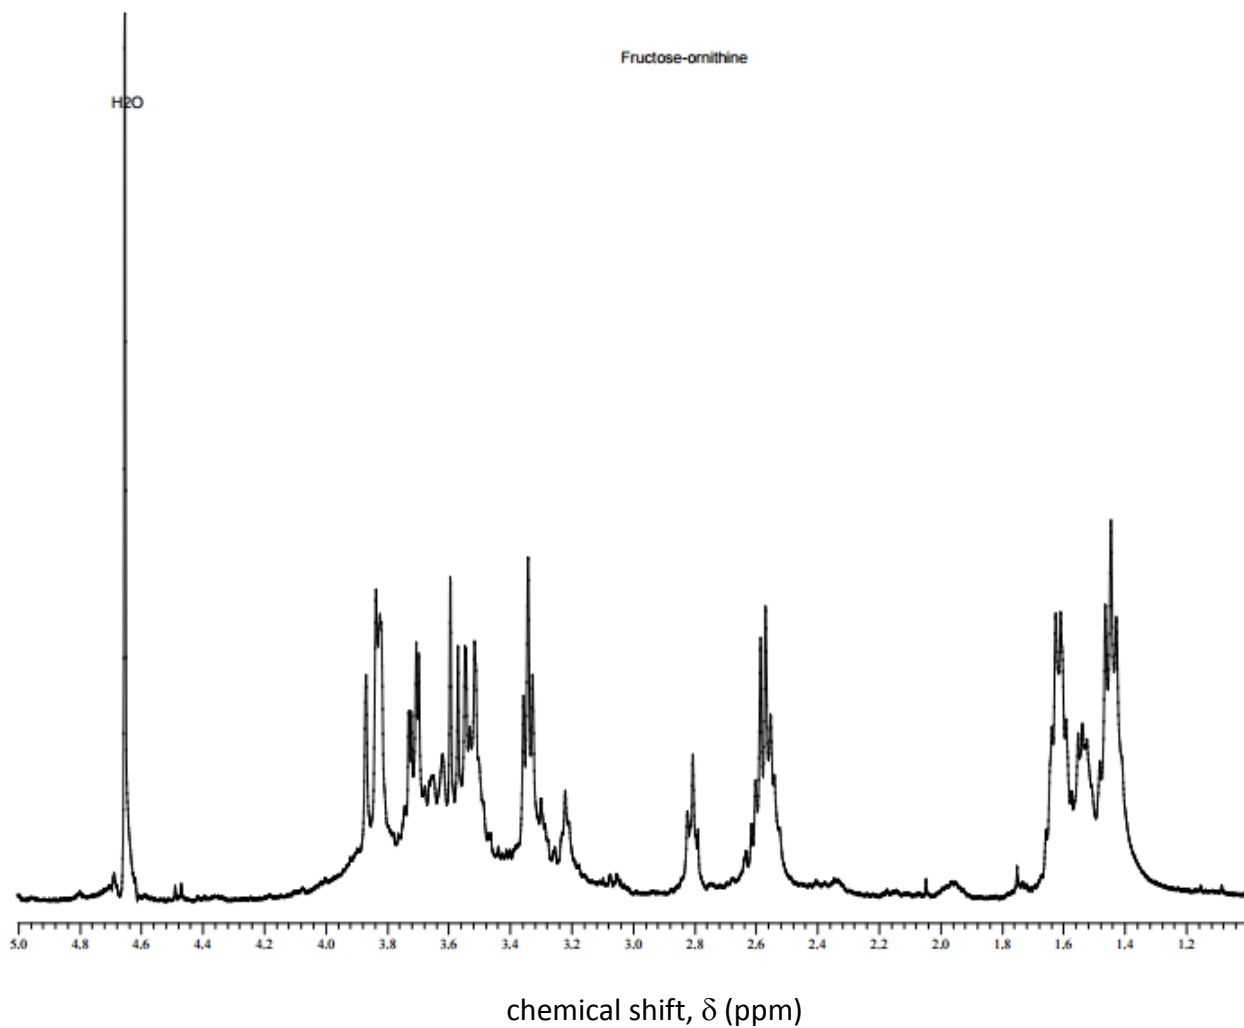

**Figure S6.  $^1\text{H}$ -NMR of fructose-ornithine.** The  $^1\text{H}$ -NMR of the fructose-ornithine preparation was as expected.

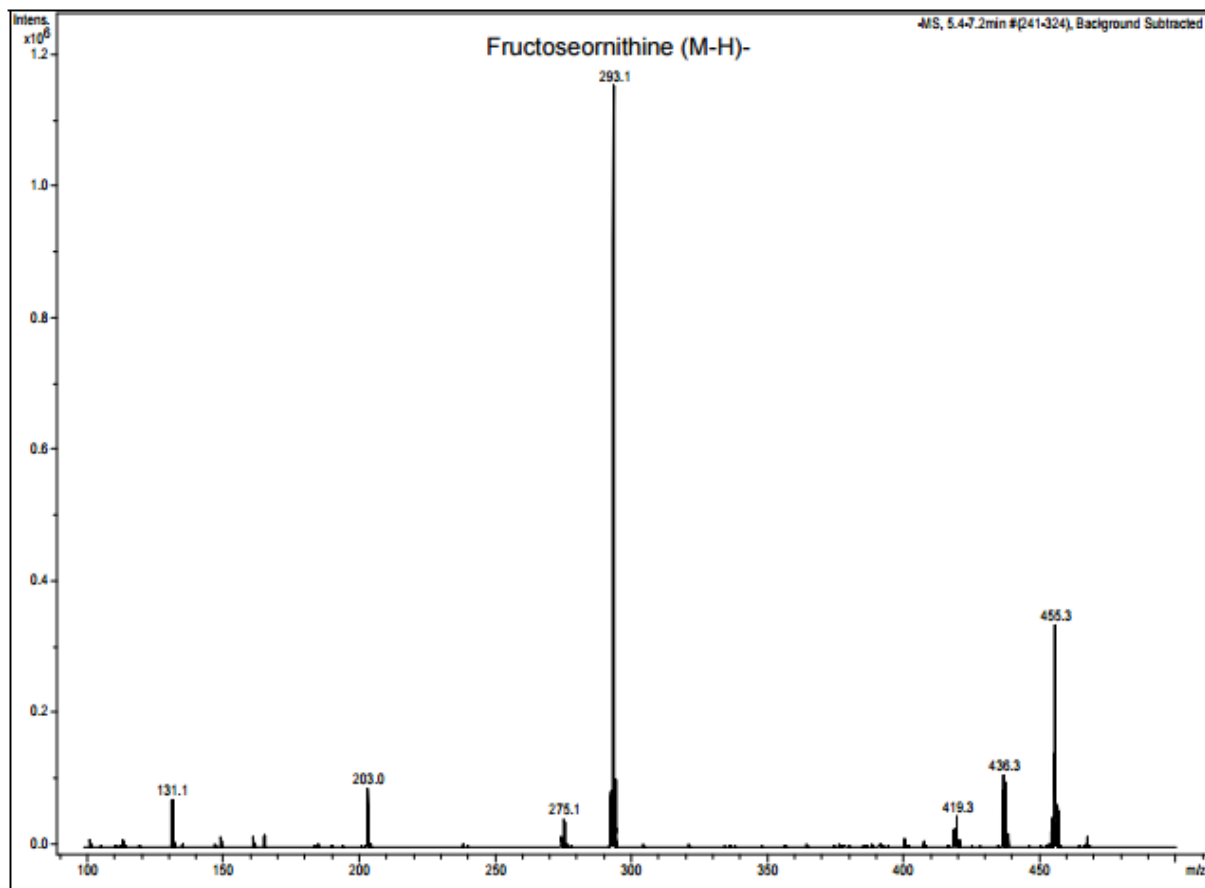

**Figure S7. Mass spectrum of fructose-ornithine.** A prominent peak with the expected mass for fructose-ornithine ( $m/z$  291,  $(M-1)^+$ ) was observed in the final product of the fructose-ornithine synthesis. There appeared to be some ornithine ( $m/z$  131.1,  $(M-1)^+$ ) in the final product.

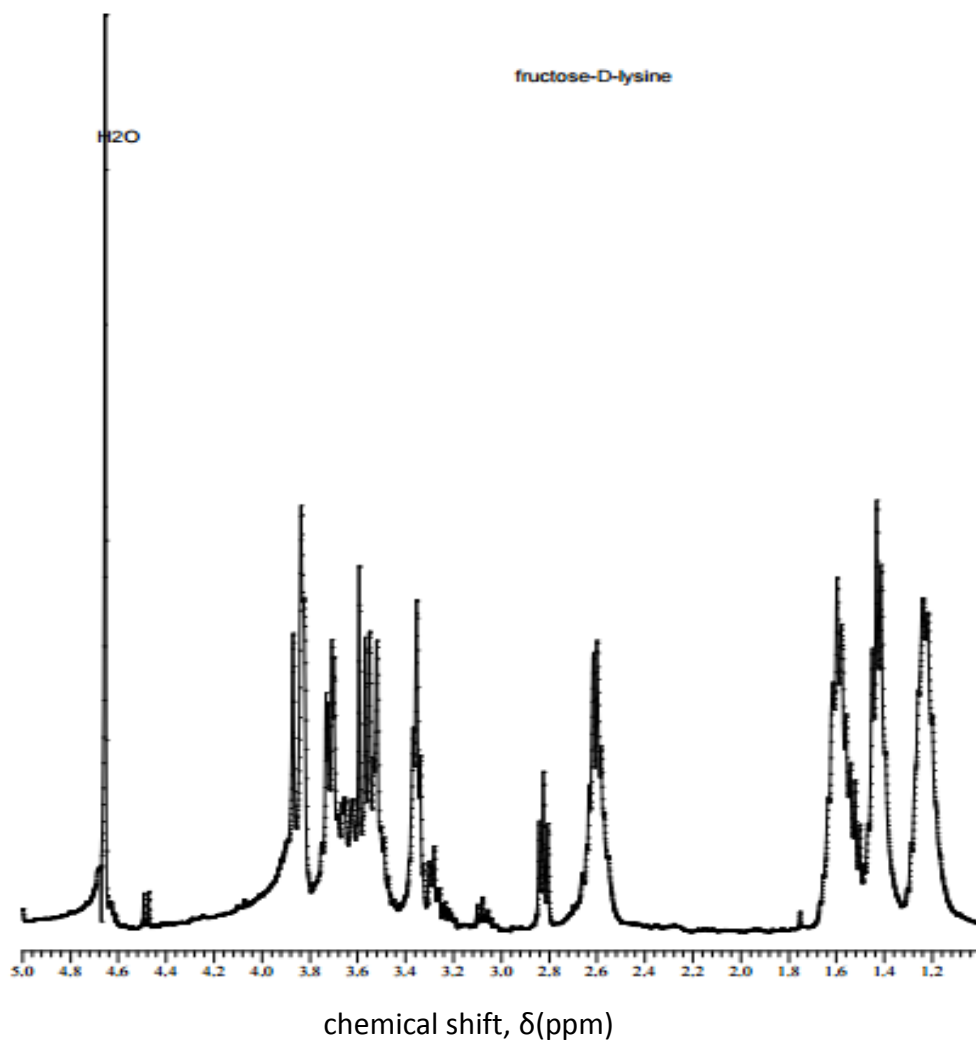

**Figure S8.  $^1\text{H}$ -NMR of fructose-D-lysine.** The  $^1\text{H}$ -NMR spectrum was similar to that for fructose-L-lysine reported by Wiame *et al.* (8).

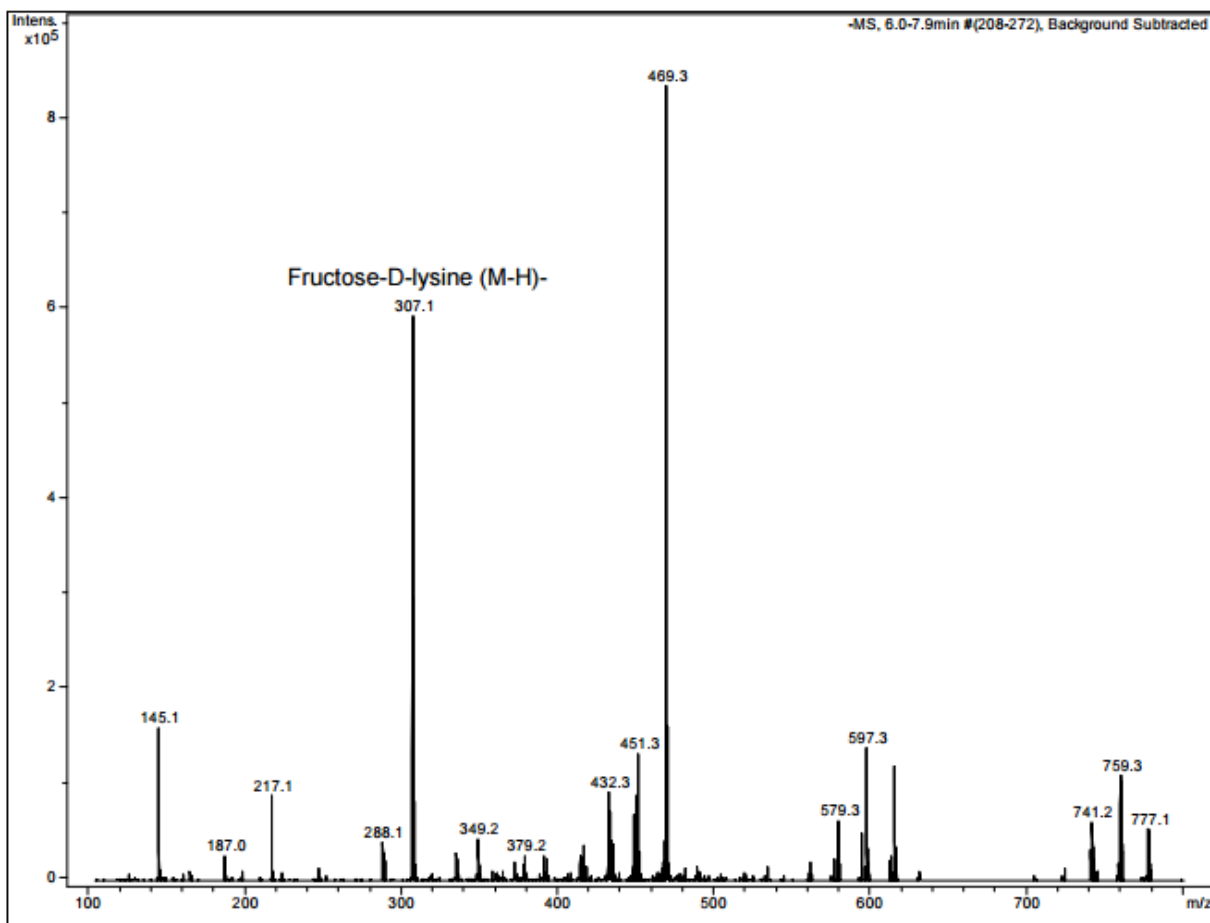

**Figure S9. Mass spectrum of fructose-D-lysine.** A prominent peak with the expected mass for fructose-D-lysine ( $m/z$  307.1,  $(M-1)^+$ ) was observed in the final product from the fructose-D-lysine synthesis. The final product appeared to have some unreacted lysine ( $m/z$  145.1,  $(M-1)^+$ ).
